# Supplementary material
Source: PubMed Central journal article supplement (PMC6061693)
Supplement: kfy115_supp.pdf [file kfy115_supp.pdf]

## **Supplementary Data:**

### **Ancestral TCDD exposure induces multigenerational histologic and transcriptomic alterations in gonads of male zebrafish**

Danielle N. Meyer\*, Bridget B. Baker†‡, and Tracie R. Baker\*†§

\*Department of Pharmacology, Wayne State University School of Medicine, Detroit, MI 48201

†Institute of Environmental Health Sciences, Center for Urban Responses to Environmental Stressors, Wayne State University, Detroit, MI 48202

‡ Division of Laboratory Animal Resources, Wayne State University, Detroit, MI 4820

**Supplemental Figure 1:** Diagram of germ cell classification stages and example image of germ cell quantification within seminiferous tubules.

**Supplemental Table 1:** RIN and Quality Control values for RNA extracted from F<sub>1</sub> and F<sub>2</sub> zebrafish testes.

**Supplemental Table 2:** Top 100 differentially regulated microarray transcripts in both directions for F<sub>1</sub> and F<sub>2</sub> generations.

**Supplemental Table 3:** Microarray transcripts from classical hormone synthesis and response pathways for F<sub>0</sub>-F<sub>2</sub> generations

**Supplemental Table 4:** Top five enriched pathways in TCDD-lineage F<sub>1</sub> and F<sub>2</sub> zebrafish testes (IPA).

**Supplemental Table 5:** qRT-PCR validation of select microarray genes in F<sub>1</sub> and F<sub>2</sub> testes

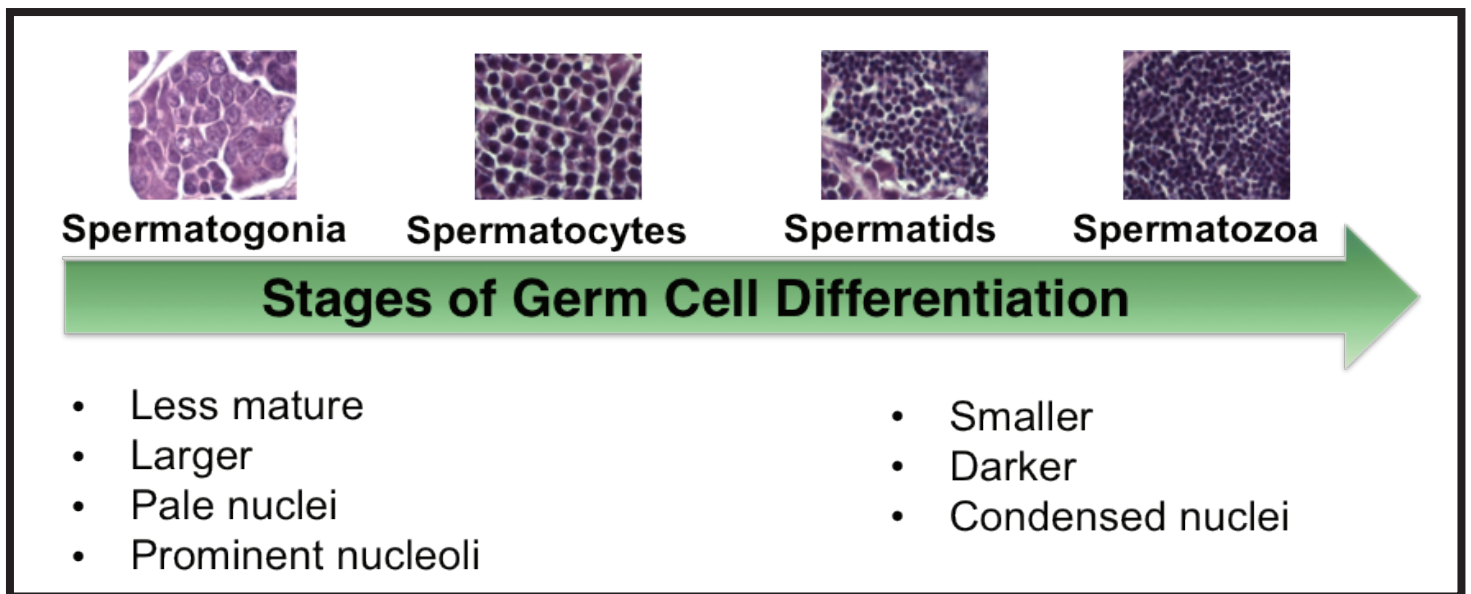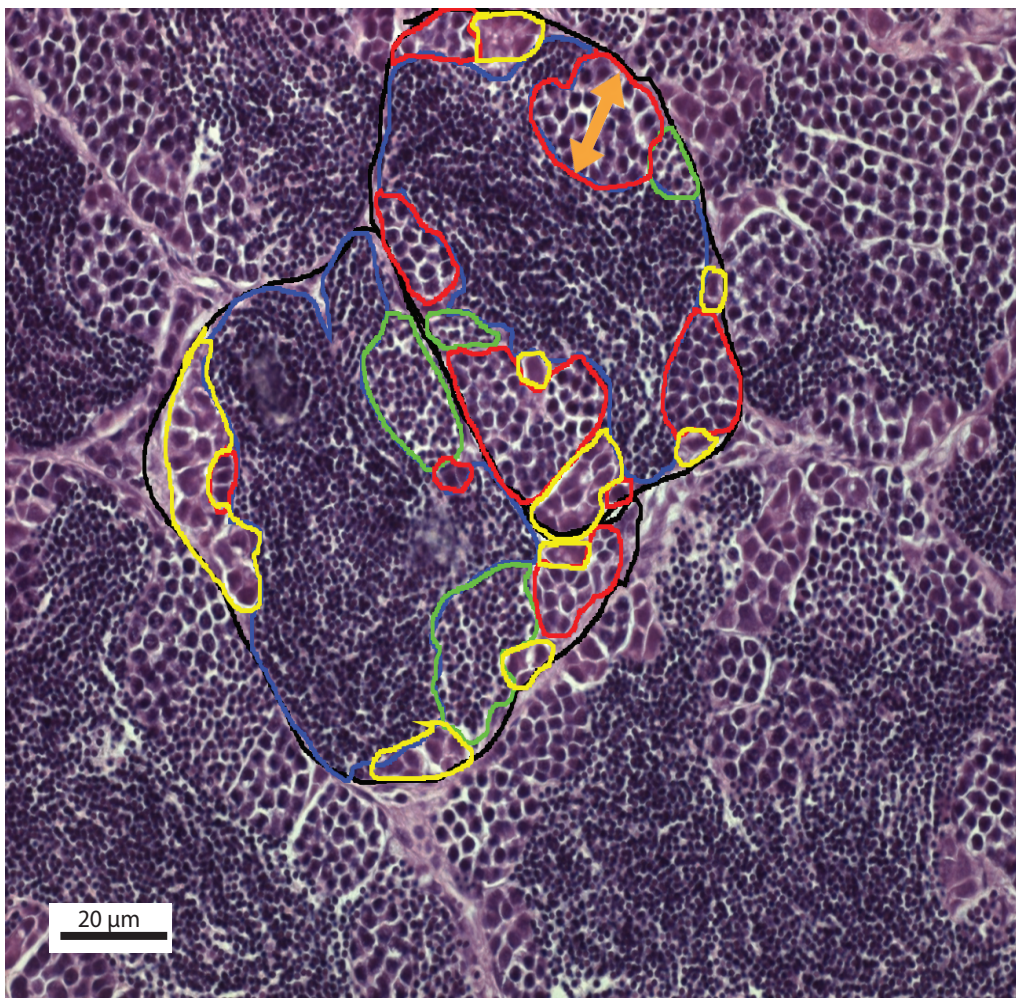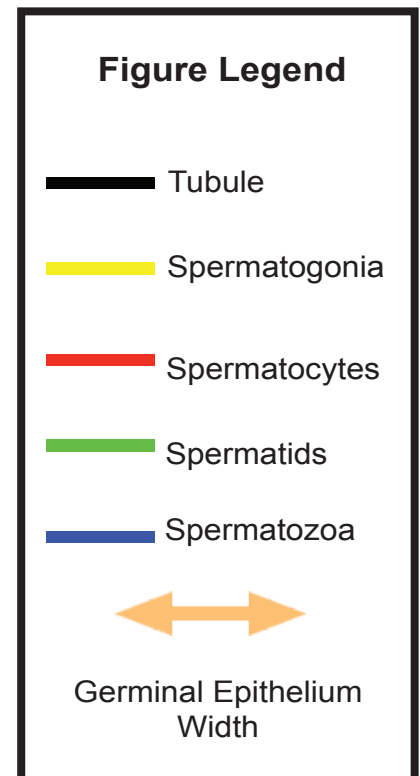

**Supplemental Figure 1:** Germ cell classification and quantification within seminiferous tubules. *Above* diagram indicates the progression of germ cell differentiation in the testes, as divided into 4 main stages of maturation. The 4 stages, from least mature to most mature, are as follows: spermatogonia, spermatocytes, spermatids, and spermatozoa. *Below left* is an example image of H&E-stained testicular tissue taken at 40X, with seminiferous tubule and germ cell areas marked as denoted in the figure legend (*bottom right*); H&E, Hematoxylin and Eosin.

**Supplemental Table 1: RIN and Quality Control values for RNA extracted from F<sub>1</sub> and F<sub>2</sub> zebrafish testes.**

|           | #  | Sample ID | Date       | RIN  | Nucleic Acid Conc (ng/ul) | 260/280 | 260/230 |
|-----------|----|-----------|------------|------|---------------------------|---------|---------|
| <b>F1</b> | 1  | F1-CM1    | 7/16/2015  | 7.20 | 77.3                      | 1.99    | 1.01    |
|           | 2  | F1-CM2    | 7/16/2015  | 7.50 | 112.6                     | 2.1     | 0.89    |
|           | 3  | F1-CM3    | 7/16/2015  | 7.90 | 105.3                     | 2.06    | 1.65    |
|           | 4  | F1-CM4    | 7/16/2015  | 7.60 | 106.1                     | 1.99    | 1.49    |
|           | 5  | F1-DM1    | 7/16/2015  | 7.10 | 101.9                     | 2.04    | 1.61    |
|           | 6  | F1-DM2    | 7/16/2015  | 7.60 | 104.9                     | 2.06    | 1.69    |
|           | 7  | F1-DM3    | 7/16/2015  | 7.40 | 102.6                     | 2.04    | 1.74    |
|           | 8  | F1-DM4    | 7/16/2015  | 8.10 | 108.7                     | 2.08    | 1.57    |
|           | 9  | F1-CM5    | 10/15/2015 | 8.20 | 95                        | 2.01    | 2.34    |
|           | 10 | F1-DM5    | 10/15/2015 | 7.50 | 67.7                      | 2.03    | 1.92    |
| <b>F2</b> | 1  | F2-CM1    | 10/15/2015 | 8.60 | 79.3                      | 2.03    | 1.86    |
|           | 2  | F2-CM2    | 10/15/2015 | 8.70 | 79                        | 2       | 1.93    |
|           | 3  | F2-CM3    | 10/15/2015 | 7.50 | 108.6                     | 1.98    | 2.21    |
|           | 4  | F2-CM4    | 10/15/2015 | 7.60 | 95.4                      | 2.01    | 2.27    |
|           | 5  | F2-CM5    | 10/15/2015 | 7.20 | 120.3                     | 2       | 2.21    |
|           | 6  | F2-DM2    | 10/15/2015 | 8.00 | 38                        | 2.05    | 1.67    |
|           | 7  | F2-DM3    | 10/15/2015 | 8.20 | 61.4                      | 2.02    | 1.4     |
|           | 8  | F2-DM4    | 10/15/2015 | 7.70 | 89.5                      | 2.01    | 1.67    |
|           | 9  | F2-DM5    | 10/15/2015 | 7.90 | 105.3                     | 2.02    | 1.8     |
|           | 10 | F2-DM6    | 10/15/2015 | 8.00 | 100.6                     | 2.04    | 1.3     |

Samples are identified by generation (F<sub>1</sub> or F<sub>2</sub>), condition (C=TCDD, D=DMSO control), sex (M=male), and number. RIN values, RNA concentrations (in ng/μl), 260/280 and 260/230 ratios are included for quality control purposes. RIN, RNA Integrity Number; TCDD, 2,3,7,8-tetrachlorodibenzo-*p*-dioxin; DMSO, dimethyl sulfoxide.

**Supplemental Table 2: Top 100 differentially regulated microarray transcripts in TCDD-lineage F1 and F2 zebrafish testes.**

| <b>F1</b>                                               |                                                                                  |           |                |
|---------------------------------------------------------|----------------------------------------------------------------------------------|-----------|----------------|
| <b>Gene Symbol</b>                                      | <b>Name</b>                                                                      | <b>FC</b> | <b>P-value</b> |
| <i>acox1</i>                                            | <i>acyl-Coenzyme A oxidase 1, palmitoyl</i>                                      | 10.65     | 0.007122       |
| <i>ela2l</i>                                            | <i>elastase 2 like</i>                                                           | 8.09      | 0.043571       |
| <i>gcga</i>                                             | <i>glucagon a</i>                                                                | 7.96      | 0.033595       |
| <i>gusb</i>                                             | <i>glucuronidase, beta</i>                                                       | 7.02      | 0.014511       |
| <i>LOC569427</i>                                        | <i>olfactomedin-4-like</i>                                                       | 6.21      | 0.044714       |
| <i>nos1apa</i>                                          | <i>nitric oxide synthase 1 (neuronal) adaptor protein a</i>                      | 4.49      | 0.019202       |
| <i>cpa2</i>                                             | <i>carboxypeptidase A2 (pancreatic)</i>                                          | 4.22      | 0.013748       |
| <i>CABZ01056052.1</i>                                   |                                                                                  | 4.01      | 0.014195       |
| <i>ins</i>                                              | <i>preproinsulin</i>                                                             | 3.86      | 0.037729       |
| <i>si:dkey-65l23.2; si:ch211-233b23.4; LOC100150789</i> | <i>si:dkey-65l23.2; si:ch211-233b23.4; uncharacterized LOC100150789</i>          | 3.51      | 0.03613        |
| <i>ush1c</i>                                            | <i>Usher syndrome 1C (autosomal recessive, severe)</i>                           | 3.43      | 0.034805       |
| <i>atp1a1a.4</i>                                        | <i>ATPase, Na<sup>+</sup>/K<sup>+</sup> transporting, alpha 1a.4 polypeptide</i> | 3.39      | 0.049122       |
| <i>gcga</i>                                             | <i>glucagon a</i>                                                                | 3.22      | 0.015751       |
| <i>slc20a1a</i>                                         | <i>solute carrier family 20, member 1a</i>                                       | 3.07      | 0.01682        |
| <i>slc20a1a</i>                                         | <i>solute carrier family 20, member 1a</i>                                       | 3.05      | 0.017882       |
| <i>LOC100537487</i>                                     | <i>endonuclease domain-containing 1 protein-like</i>                             | 2.96      | 0.033988       |
| <i>Sl:CH73-213J4.4</i>                                  |                                                                                  | 2.9       | 0.038319       |
| <i>cdx1a</i>                                            | <i>caudal type homeo box transcription factor 1 a</i>                            | 2.84      | 0.046777       |
| <i>slc20a1a</i>                                         | <i>solute carrier family 20, member 1a</i>                                       | 2.84      | 0.009027       |
| <i>ndufa4</i>                                           | <i>NADH dehydrogenase (ubiquinone) 1 alpha subcomplex, 4</i>                     | 2.82      | 0.009371       |
| <i>klf4a</i>                                            | <i>Kruppel-like factor 4a</i>                                                    | 2.79      | 0.037474       |
| <i>LOC100330987</i>                                     | <i>uncharacterized protein C11orf96-like</i>                                     | 2.79      | 0.003261       |
| <i>cygb1</i>                                            | <i>cytoglobin 1</i>                                                              | 2.41      | 0.042789       |
| <i>CU638714.1; CR381686.1</i>                           |                                                                                  | 2.38      | 0.048911       |
| <i>ptger4b</i>                                          | <i>prostaglandin E receptor 4 (subtype EP4) b</i>                                | 2.38      | 0.047819       |
| <i>LOC100536370</i>                                     | <i>uncharacterized LOC100536370</i>                                              | 2.37      | 0.009538       |
| <i>LOC566587</i>                                        | <i>ERBB receptor feedback inhibitor 1-like</i>                                   | 2.33      | 0.038645       |
| <i>irf1b</i>                                            | <i>interferon regulatory factor 1b</i>                                           | 2.27      | 0.035662       |
| <i>loxl2a; LOC100535557</i>                             | <i>lysyl oxidase-like 2a; lysyl oxidase homolog 2-like</i>                       | 2.26      | 0.01103        |
| <i>csrnp1b</i>                                          | <i>cysteine-serine-rich nuclear protein 1b</i>                                   | 2.24      | 0.043279       |
| <i>rhag</i>                                             | <i>Rhesus blood group-associated glycoprotein</i>                                | 2.24      | 0.032828       |
| <i>sgk1</i>                                             | <i>serum/glucocorticoid regulated kinase 1</i>                                   | 2.22      | 0.039467       |
| <i>junbb</i>                                            | <i>jun B proto-oncogene b</i>                                                    | 2.2       | 0.034422       |
| <i>zgc:113317</i>                                       | <i>zgc:113317</i>                                                                | 2.15      | 0.007183       |
| <i>gpr81-4</i>                                          | <i>GPR81-like protein 4</i>                                                      | 2.12      | 0.049067       |
| <i>LOC100535673</i>                                     | <i>uncharacterized LOC100535673</i>                                              | 2.11      | 0.021724       |

|                                         |                                                                                                      |       |          |
|-----------------------------------------|------------------------------------------------------------------------------------------------------|-------|----------|
| <i>LOC565181; TNS1 (2 of 2)</i>         | <i>tensin-1-like; tensin 1</i>                                                                       | 2.09  | 0.049091 |
| <i>si:ch211-195h23.3</i>                | <i>si:ch211-195h23.3</i>                                                                             | 2.09  | 0.047065 |
| <i>gcgb</i>                             | <i>glucagon b</i>                                                                                    | 2.08  | 0.030273 |
| <i>syne2b</i>                           | <i>spectrin repeat containing, nuclear envelope 2b</i>                                               | 2.08  | 0.017059 |
| <i>cxcr7b</i>                           | <i>chemokine (C-X-C motif) receptor 7b</i>                                                           | 2.06  | 0.01365  |
| <i>LOC100331765</i>                     | <i>serine/threonine-protein kinase WNK2-like</i>                                                     | 2.06  | 0.046246 |
| <i>serpine1</i>                         | <i>serpin peptidase inhibitor, clade E (nexin, plasminogen activator inhibitor type 1), member 1</i> | 2.06  | 0.041486 |
| <i>lrrc15</i>                           | <i>leucine rich repeat containing 15</i>                                                             | 2.05  | 0.018957 |
| <i>acta2</i>                            | <i>actin, alpha 2, smooth muscle, aorta</i>                                                          | 2.03  | 0.049748 |
| <i>dab1a; DAB1A</i>                     | <i>disabled homolog 1a (Drosophila)</i>                                                              | 2.03  | 0.016919 |
| <i>hivep2</i>                           | <i>human immunodeficiency virus type I enhancer binding protein 2</i>                                | 2     | 0.039192 |
| <i>slco1f1</i>                          | <i>solute carrier organic anion transporter family, member 1F1</i>                                   | 2     | 0.040159 |
| <i>acta1a</i>                           | <i>actin, alpha 1a, skeletal muscle</i>                                                              | 1.99  | 0.011515 |
| <i>LOC100536370</i>                     | <i>uncharacterized LOC100536370</i>                                                                  | 1.99  | 0.005428 |
| <i>c1galt1a</i>                         | <i>core 1 synthase, glycoprotein-N-acetylgalactosamine 3-beta-galactosyltransferase, 1a</i>          | -2.18 | 0.04205  |
| <i>LOC100537663</i>                     | <i>KH domain-containing, RNA-binding, signal transduction-associated protein 3-like</i>              | -2.18 | 0.03649  |
| <i>zgc:64116</i>                        | <i>zgc:64116</i>                                                                                     | -2.19 | 0.045147 |
| <i>zgc:174320; LOC795264</i>            | <i>zgc:174320; uncharacterized LOC795264</i>                                                         | -2.22 | 0.030928 |
| <i>or137-2</i>                          | <i>odorant receptor, family H, subfamily 137, member 2</i>                                           | -2.23 | 0.002726 |
| <i>spra</i>                             | <i>sepiapterin reductase a</i>                                                                       | -2.27 | 0.009448 |
| <i>LOC100005785</i>                     | <i>uncharacterized LOC100005785</i>                                                                  | -2.28 | 0.048225 |
| <i>arf3b</i>                            | <i>ADP-ribosylation factor 3b</i>                                                                    | -2.29 | 0.003067 |
| <i>homez</i>                            | <i>homeodomain leucine zipper gene</i>                                                               | -2.3  | 0.045257 |
| <i>si:dkey-253d23.11</i>                | <i>si:dkey-253d23.11</i>                                                                             | -2.3  | 0.040684 |
| <i>si:ch211-106h4.6</i>                 | <i>si:ch211-106h4.6</i>                                                                              | -2.35 | 0.008779 |
| <i>si:ch211-106h4.6</i>                 | <i>si:ch211-106h4.6</i>                                                                              | -2.35 | 0.008779 |
| <i>si:ch211-106h4.6</i>                 | <i>si:ch211-106h4.6</i>                                                                              | -2.36 | 0.010954 |
| <i>cldna</i>                            | <i>claudin a</i>                                                                                     | -2.38 | 0.026446 |
| <i>LOC100002266; SI:CH211-236P5.3</i>   | <i>NACHT, LRR and PYD domains-containing protein 1-like</i>                                          | -2.39 | 0.002994 |
| <i>si:dkey-222p3.1</i>                  | <i>si:dkey-222p3.1</i>                                                                               | -2.43 | 0.023267 |
| <i>SI:DKEY-78K22.2; ZNF519 (2 of 4)</i> | <i>zinc finger protein 519</i>                                                                       | -2.45 | 0.019099 |
| <i>LOC799595</i>                        | <i>immunoglobulin superfamily DCC subclass member 3-like</i>                                         | -2.46 | 0.018036 |
| <i>or137-7</i>                          | <i>odorant receptor, family H, subfamily 137, member 7</i>                                           | -2.49 | 0.00389  |
| <i>carm1l</i>                           | <i>coactivator-associated arginine methyltransferase 1, like</i>                                     | -2.5  | 0.040069 |
| <i>LOC568123</i>                        | <i>cyclic nucleotide-gated cation channel alpha-4-like</i>                                           | -2.5  | 0.009544 |
| <i>or137-4</i>                          | <i>odorant receptor, family H, subfamily 137, member 4</i>                                           | -2.52 | 0.008726 |
| <i>gna15.2</i>                          | <i>guanine nucleotide binding protein (G protein), alpha 15.2 (Gq class)</i>                         | -2.54 | 0.009415 |
| <i>adcy8</i>                            | <i>adenylate cyclase 8 (brain)</i>                                                                   | -2.56 | 0.008292 |
| <i>rlbp1b</i>                           | <i>retinaldehyde binding protein 1b</i>                                                              | -2.56 | 0.046991 |
| <i>LOC564083</i>                        | <i>uncharacterized LOC564083</i>                                                                     | -2.62 | 0.018925 |

|                                                     |                                                                                                                 |       |          |
|-----------------------------------------------------|-----------------------------------------------------------------------------------------------------------------|-------|----------|
| <i>murcb</i>                                        | <i>muscle-related coiled-coil protein b</i>                                                                     | -2.68 | 0.048577 |
| <i>zymnd12</i>                                      | <i>zinc finger, MYND-type containing 12</i>                                                                     | -2.77 | 0.013232 |
| <i>slc4a8</i>                                       | <i>solute carrier family 4, sodium bicarbonate cotransporter, member 8</i>                                      | -2.78 | 0.027951 |
| <i>LOC573741; LOC100537537</i>                      | <i>uncharacterized LOC573741; myocardin-like</i>                                                                | -2.79 | 0.026416 |
| <i>pcdh8</i>                                        | <i>protocadherin 8</i>                                                                                          | -2.81 | 0.007844 |
| <i>sgms2</i>                                        | <i>sphingomyelin synthase 2</i>                                                                                 | -2.83 | 0.001406 |
| <i>zgc:173614; SI:DKEY-78K22.2; SI:DKEY-82I20.3</i> | <i>zgc:173614</i>                                                                                               | -2.85 | 0.044021 |
| <i>clrn1</i>                                        | <i>clarin 1</i>                                                                                                 | -2.9  | 0.027305 |
| <i>LOC100537130; LOC560161</i>                      | <i>protein NLRC3-like; neoverrucotoxin subunit beta-like</i>                                                    | -2.91 | 0.0179   |
| <i>LOC100537832</i>                                 | <i>uncharacterized protein C1orf222-like</i>                                                                    | -2.91 | 0.018541 |
| <i>LOC100151470</i>                                 | <i>olfactory receptor 4F6-like</i>                                                                              | -3    | 0.001323 |
| <i>zgc:113886</i>                                   | <i>zgc:113886</i>                                                                                               | -3.01 | 0.018457 |
| <i>si:dkeyp-72h1.1</i>                              | <i>si:dkeyp-72h1.1</i>                                                                                          | -3.08 | 0.021971 |
| <i>LOC100151470</i>                                 | <i>olfactory receptor 4F6-like</i>                                                                              | -3.41 | 0.0029   |
| <i>CU929354.3; zgc:100951</i>                       | <i>zgc:100951</i>                                                                                               | -3.43 | 0.013361 |
| <i>smyd1a</i>                                       | <i>SET and MYND domain containing 1a</i>                                                                        | -3.6  | 0.006411 |
| <i>or137-5; or137-9</i>                             | <i>odorant receptor, family H, subfamily 137, member 5; odorant receptor, family H, subfamily 137, member 9</i> | -3.86 | 0.003423 |
| <i>or137-4</i>                                      | <i>odorant receptor, family H, subfamily 137, member 4</i>                                                      | -3.88 | 0.001813 |
| <i>or137-5</i>                                      | <i>odorant receptor, family H, subfamily 137, member 5</i>                                                      | -4.17 | 0.004994 |
| <i>zgc:113969</i>                                   | <i>zgc:113969</i>                                                                                               | -4.49 | 0.030852 |
| <i>LOC100004625</i>                                 | <i>c-C chemokine receptor type 2-like</i>                                                                       | -5.78 | 0.013501 |
| <i>or137-3</i>                                      | <i>odorant receptor, family H, subfamily 137, member 3</i>                                                      | -6.01 | 0.001026 |
| <i>LOC100005908</i>                                 | <i>apolipoprotein A-IV-like</i>                                                                                 | -7.65 | 0.03141  |
| <i>LOC100331852</i>                                 | <i>uncharacterized LOC100331852</i>                                                                             | -8.88 | 0.047343 |

| <b>F2</b>                         |                                                                                                         |           |                |
|-----------------------------------|---------------------------------------------------------------------------------------------------------|-----------|----------------|
| <b>Gene Symbol</b>                | <b>Name</b>                                                                                             | <b>FC</b> | <b>P-value</b> |
| <i>CELA1 (3 of 8)</i>             | <i>chymotrypsin-like elastase family, member 1</i>                                                      | 29.62     | 0.004719       |
| <i>LOC100536200</i>               | <i>uncharacterized LOC100536200</i>                                                                     | 22.39     | 0.031717       |
| <i>ptprc</i>                      | <i>protein tyrosine phosphatase, receptor type, C</i>                                                   | 18.35     | 0.004682       |
| <i>LOC100330158</i>               | <i>novel NACHT domain containing protein-like</i>                                                       | 15.16     | 0.016091       |
| <i>LOC100536612; LOC100536895</i> | <i>uncharacterized LOC100536612; protein NLRC3-like</i>                                                 | 13.68     | 0.000022       |
| <i>LOC100149909</i>               | <i>NACHT, LRR and PYD domains-containing protein 3-like</i>                                             | 11.13     | 0.000006       |
| <i>LOC100330158</i>               | <i>novel NACHT domain containing protein-like</i>                                                       | 10.94     | 0.007158       |
| <i>SC:D217</i>                    |                                                                                                         | 10.54     | 2.34E-09       |
| <i>zgc:113098</i>                 | <i>zgc:113098</i>                                                                                       | 10.48     | 0.001195       |
| <i>btf3</i>                       | <i>basic transcription factor 3</i>                                                                     | 9.67      | 0.002795       |
| <i>LOC100001465</i>               | <i>NACHT, LRR and PYD domains-containing protein 12-like</i>                                            | 9.22      | 0.023902       |
| <i>LOC564346; LOC100330158</i>    | <i>NACHT, LRR and PYD domains-containing protein 3-like; novel NACHT domain containing protein-like</i> | 9.09      | 0.009308       |

|                                                                                |                                                                                                           |       |          |
|--------------------------------------------------------------------------------|-----------------------------------------------------------------------------------------------------------|-------|----------|
| LOC100538282                                                                   | <i>v-set domain-containing T-cell activation inhibitor 1-like</i>                                         | 9.06  | 0.006737 |
| LOC100330140                                                                   | <i>oocyte zinc finger protein XICOF6-like</i>                                                             | 8.97  | 0.006213 |
| <i>ptprc</i>                                                                   | <i>protein tyrosine phosphatase, receptor type, C</i>                                                     | 8.79  | 0.009325 |
| LOC100149909                                                                   | <i>NACHT, LRR and PYD domains-containing protein 3-like</i>                                               | 8.59  | 0.000003 |
| LOC100333695; LOC100333766                                                     | <i>protein NLRC3-like; stonustoxin subunit alpha-like</i>                                                 | 8.32  | 0.01293  |
| <i>spata4</i> ; <i>zgc:112531</i>                                              | <i>spermatogenesis associated 4; zgc:112531</i>                                                           | 8.22  | 0.000078 |
| LOC560036; LOC100537841;<br>LOC100332192; <i>SI:CH211-145H19.5</i>             | <i>zinc finger protein 271-like</i>                                                                       | 7.89  | 0.002452 |
| LOC100536726                                                                   | <i>uncharacterized LOC100536726</i>                                                                       | 7.48  | 0.027077 |
| <i>oc90</i> ; LOC100537480                                                     | <i>otoconin 90; uncharacterized LOC100537480</i>                                                          | 7.28  | 0.0015   |
| LOC100534835                                                                   | <i>uncharacterized LOC100534835</i>                                                                       | 7.09  | 0.014181 |
| LOC799802                                                                      | <i>stonustoxin subunit beta-like</i>                                                                      | 6.93  | 0.008803 |
| MDFIC (1 of 2)                                                                 | <i>MyoD family inhibitor domain containing uncharacterized LOC100329764; uncharacterized LOC100330473</i> | 6.39  | 0.000651 |
| LOC100329764; LOC100330473                                                     |                                                                                                           | 6.36  | 0.000193 |
| <i>acox1</i>                                                                   | <i>acyl-Coenzyme A oxidase 1, palmitoyl</i>                                                               | 6.12  | 0.000522 |
| <i>nos1apa</i>                                                                 | <i>nitric oxide synthase 1 (neuronal) adaptor protein a</i>                                               | 6.02  | 0.000003 |
| <i>si:ch73-190m4.1</i>                                                         | <i>si:ch73-190m4.1</i>                                                                                    | 5.99  | 0.014795 |
| LOC568664                                                                      | <i>NACHT, LRR and PYD domains-containing protein 3-like</i>                                               | 5.95  | 0.017124 |
| LOC100333766; LOC100333695                                                     | <i>stonustoxin subunit alpha-like; protein NLRC3-like</i>                                                 | 5.87  | 0.007413 |
| LOC100333695; LOC100333766                                                     | <i>protein NLRC3-like; stonustoxin subunit alpha-like</i>                                                 | 5.52  | 0.014855 |
| <i>sell</i>                                                                    | <i>selenoprotein L</i>                                                                                    | 5.48  | 0.021391 |
| <i>zgc:136302</i>                                                              | <i>zgc:136302</i>                                                                                         | 5.31  | 0.011571 |
| LOC100333818                                                                   | <i>coiled-coil domain-containing protein 15-like</i>                                                      | 5.28  | 0.004599 |
| <i>zgc:113119</i> ; LOC100332485                                               | <i>zgc:113119; zinc finger protein 585B-like</i>                                                          | 5.27  | 0.000006 |
| LOC100535078; <i>pttg1</i> ;<br>LOC100535199                                   | <i>securin-like; pituitary tumor-transforming 1; uncharacterized LOC100535199</i>                         | 5.03  | 0.00073  |
| <i>SC:D217</i>                                                                 |                                                                                                           | 4.63  | 6.91E-07 |
| <i>zgc:91850</i> ; LOC561730                                                   | <i>zgc:91850; e3 ubiquitin-protein ligase RBBP6-like</i>                                                  | 4.63  | 0.015358 |
| <i>im:7141269</i>                                                              | <i>im:7141269</i>                                                                                         | 4.42  | 0.006418 |
| CABZ01056052.1                                                                 |                                                                                                           | 4.28  | 0.000608 |
| LOC100537304; <i>mrps22</i>                                                    | <i>28S ribosomal protein S22, mitochondrial-like; mitochondrial ribosomal protein S22</i>                 | 4.27  | 0.000024 |
| <i>mlphb</i>                                                                   | <i>melanophilin b</i>                                                                                     | 4.18  | 0.014774 |
| LOC100536484                                                                   | <i>gastrula zinc finger protein XICGF57.1-like</i>                                                        | 4.16  | 0.027618 |
| <i>SI:DKEY-237G15.5</i> ; <i>SI:DKEY-16P6.1</i>                                |                                                                                                           | 4.15  | 0.002425 |
| LOC568525                                                                      | <i>uncharacterized LOC568525</i>                                                                          | 4     | 0.020579 |
| <i>zgc:173703</i> ; <i>SI:DKEY-81I14.3</i>                                     | <i>zgc:173703</i>                                                                                         | 3.84  | 0.022208 |
| LOC100149903                                                                   | <i>GTPase IMAP family member 7-like</i>                                                                   | 3.82  | 0.008797 |
| <i>cyb5d1</i>                                                                  | <i>cytochrome b5 domain containing 1</i>                                                                  | 3.68  | 0.028146 |
| <i>nudt15</i>                                                                  | <i>nudix (nucleoside diphosphate linked moiety X)-type motif 15</i>                                       | 3.68  | 0.002318 |
| <i>mdh1a</i>                                                                   | <i>malate dehydrogenase 1a, NAD (soluble)</i>                                                             | 3.57  | 0.00175  |
| <i>si:ch211-149a19.3</i> ; <i>SI:CH211-149A19.4</i> ; <i>SI:CH211-149A19.3</i> | <i>si:ch211-149a19.3</i>                                                                                  | -2.94 | 0.039149 |

|                                                         |                                                                  |        |          |
|---------------------------------------------------------|------------------------------------------------------------------|--------|----------|
| LOC794617                                               | uncharacterized LOC794617                                        | -2.96  | 0.022567 |
| zgc:153440                                              | zgc:153440                                                       | -2.99  | 0.045296 |
| LOC100006875                                            | uncharacterized LOC100006875                                     | -3     | 0.000011 |
| zgc:136254                                              | zgc:136254                                                       | -3.03  | 0.021341 |
| LOC569848; SI:CH211-59H6.1                              | uncharacterized LOC569848                                        | -3.25  | 0.000022 |
| pde6h                                                   | phosphodiesterase 6H, cGMP-specific, cone, gamma                 | -3.25  | 0.001533 |
| LOC100148709                                            | protein NLRC3-like                                               | -3.38  | 0.024599 |
| LOC100006805                                            | signaling lymphocytic activation molecule-like                   | -3.39  | 0.000101 |
| SI:CH211-178J18.2                                       |                                                                  | -3.54  | 0.000309 |
| rasa1b                                                  | RAS p21 protein activator 1b                                     | -3.56  | 0.000721 |
| si:dkey-65b12.12                                        | si:dkey-65b12.12                                                 | -3.58  | 0.001313 |
| LOC568902                                               | NACHT, LRR and PYD domains-containing protein 8-like             | -3.63  | 0.019847 |
| LOC100005785                                            | uncharacterized LOC100005785                                     | -3.79  | 0.016891 |
| CABZ01081294.1                                          |                                                                  | -3.96  | 0.011416 |
| SI:DKEY-65B12.10                                        |                                                                  | -4.01  | 0.000954 |
| SI:DKEY-256I11.3                                        |                                                                  | -4.09  | 0.002904 |
| LOC100537269                                            | uncharacterized LOC100537269                                     | -4.18  | 0.002509 |
| SI:DKEY-78K22.2                                         |                                                                  | -4.45  | 0.000019 |
| LOC100333560                                            | protein NLRC3-like                                               | -4.5   | 0.000234 |
| LOC100333474                                            | uncharacterized LOC100333474                                     | -4.51  | 0.000156 |
| SI:DKEY-211G8.8                                         |                                                                  | -4.61  | 0.005055 |
| si:dkey-211g8.5                                         | si:dkey-211g8.5                                                  | -4.88  | 0.007155 |
| LOC100151195                                            | hereditary hemochromatosis protein homolog                       | -4.92  | 0.040714 |
| adam28                                                  | a disintegrin and metallopeptidase domain 28                     | -5.13  | 0.035483 |
| LOC100535646                                            | uncharacterized LOC100535646                                     | -5.15  | 0.009627 |
| LOC100006875                                            | uncharacterized LOC100006875                                     | -5.19  | 0.000003 |
| LOC100002043                                            | uncharacterized LOC100002043                                     | -5.27  | 0.000098 |
| si:ch211-149a19.3; SI:CH211-149A19.4; SI:CH211-149A19.3 | si:ch211-149a19.3                                                | -5.35  | 0.017917 |
| LOC568902                                               | NACHT, LRR and PYD domains-containing protein 8-like             | -6.23  | 0.007425 |
| ftr19                                                   | finTRIM family, member 19                                        | -6.37  | 0.006521 |
| SI:CH73-213J4.4                                         |                                                                  | -6.46  | 0.004166 |
| si:dkey-65b12.12; SI:DKEY-65B12.10                      | si:dkey-65b12.12                                                 | -6.58  | 0.001345 |
| si:ch211-149a19.3; SI:CH211-149A19.4; SI:CH211-149A19.3 | si:ch211-149a19.3                                                | -6.86  | 0.029359 |
| LOC568902                                               | NACHT, LRR and PYD domains-containing protein 8-like             | -7.03  | 0.003139 |
| LOC568944                                               | NACHT, LRR and PYD domains-containing protein 1-like             | -7.17  | 0.020758 |
| si:dkey-29d5.1                                          | si:dkey-29d5.1                                                   | -7.3   | 0.000008 |
| grn1                                                    | granulin 1                                                       | -7.92  | 0.040113 |
| grn1                                                    | granulin 1                                                       | -8.63  | 0.049484 |
| LOC100536768                                            | uncharacterized LOC100536768                                     | -9.93  | 0.007219 |
| trim35-3; LOC100003935                                  | tripartite motif containing 35-3; ret finger protein-like        | -11.06 | 0.038682 |
| si:dkey-65I23.2; si:ch211-233b23.4; LOC100150789        | si:dkey-65I23.2; si:ch211-233b23.4; uncharacterized LOC100150789 | -11.17 | 0.016002 |



|                            |                                                                                                                            |         |          |
|----------------------------|----------------------------------------------------------------------------------------------------------------------------|---------|----------|
| <i>LOC571714; PPP1R32</i>  | <i>uncharacterized protein C11orf66 homolog; protein phosphatase 1, regulatory subunit 32</i>                              | -15.58  | 0.023156 |
| <i>cmtm6; LOC100535165</i> | <i>CKLF-like MARVEL transmembrane domain containing 6; CKLF-like MARVEL transmembrane domain-containing protein 6-like</i> | -19.67  | 0.003737 |
| <i>aste1</i>               | <i>asteroid homolog 1 (Drosophila)</i>                                                                                     | -19.84  | 0.005095 |
| <i>grn2</i>                | <i>granulin 2</i>                                                                                                          | -22.33  | 0.013033 |
| <i>LOC100006764</i>        | <i>uncharacterized LOC100006764</i>                                                                                        | -23.14  | 1.49E-07 |
| <i>mhc1uba</i>             | <i>major histocompatibility complex class I UBA</i>                                                                        | -26.44  | 0.004289 |
| <i>LOC100004625</i>        | <i>c-C chemokine receptor type 2-like</i>                                                                                  | -42.39  | 5.37E-07 |
| <i>ptr50; LOC100330813</i> | <i>finTRIM family, member 50; e3 ubiquitin/ISG15 ligase TRIM25-like</i>                                                    | -131.88 | 0.03826  |

Gene symbols and names are listed for the 50 most up- and down-regulated transcripts in TCDD-lineage F<sub>1</sub> and F<sub>2</sub> fish. TCDD, 2,3,7,8-tetrachlorodibenzo-*p*-dioxin; FC, fold change.

**Supplemental Table 3: Microarray transcripts from classical hormone synthesis and response pathways for F<sub>0</sub>-F<sub>2</sub> generations**

| Symbol          | Name                                                                              | F0          |             | F1    |         | F2    |         |
|-----------------|-----------------------------------------------------------------------------------|-------------|-------------|-------|---------|-------|---------|
|                 |                                                                                   | FC          | P-value     | FC    | P-value | FC    | P-value |
| <i>amh</i>      | <i>anti-Mullerian hormone</i>                                                     | 1.62        | 0.15        | 1.31  | 0.55    | -1.5  | 0.43    |
| <i>ar</i>       | <i>androgen receptor</i>                                                          | 1.08        | 0.07        | 1.06  | 0.21    | 1.2   | 0.07    |
| <i>cyp1a</i>    | <i>cytochrome P450, family 1, subfamily A</i>                                     | 2.2         | 0.06        | 1.7   | 0.39    | -1.25 | 0.89    |
| <i>cyp1b1</i>   | <i>cytochrome P450, family 1, subfamily B, polypeptide 1</i>                      | -1.02       | 0.1         | 1.09  | 0.31    | -1.02 | 0.91    |
| <i>cyp19a1a</i> | <i>cytochrome P450, family 19, subfamily A, polypeptide 1a</i>                    | -1.12       | 0.24        | 1.23  | 0.42    | -1.07 | 0.78    |
| <i>cyp19a1b</i> | <i>cytochrome P450, family 19, subfamily A, polypeptide 1b</i>                    | -1.03       | 0.8         | 1.14  | 0.93    | -1.1  | 0.51    |
| <i>dmrt1</i>    | <i>doublesex and mab-3 related transcription factor 1</i>                         | 1.07        | 0.73        | -1.15 | 0.36    | -1.08 | 0.33    |
| <i>esr1</i>     | <i>estrogen receptor 1</i>                                                        | 1.08        | 0.59        | -1.06 | 0.85    | 1.24  | 0.028   |
| <i>esr2a</i>    | <i>estrogen receptor 2a</i>                                                       | 1.17        | 0.12        | 1.06  | 0.29    | -1.04 | 0.89    |
| <i>esr2b</i>    | <i>estrogen receptor 2b</i>                                                       | 1.55        | 0.06        | 1.3   | 0.18    | 1.29  | 0.75    |
| <i>foxl2</i>    | <i>forkhead box L2</i>                                                            | -1.01       | 0.98        | 1.02  | 0.8     | 1.08  | 0.36    |
| <i>fshb</i>     | <i>follicle-stimulating hormone, beta polypeptide</i>                             | -1.13       | 0.1         | -1.35 | 0.14    | 1.06  | 0.30    |
| <i>fshr</i>     | <i>follicle-stimulating hormone receptor</i>                                      | 1.28        | 0.2         | 1.16  | 0.4     | -1.16 | 0.97    |
| <i>gstal</i>    | <i>glutathione S-transferase, alpha-like</i>                                      | -1.15       | 0.69        | 1.4   | 0.13    | -1.48 | 0.57    |
| <i>hsd3b7</i>   | <i>hydroxy-delta-5-steroid dehydrogenase, 3 beta- and steroid delta-isomerase</i> | -1.17       | 0.57        | -1.01 | 0.78    | 1.3   | 0.3     |
| <i>hsd11b2</i>  | <i>hydroxysteroid 11-beta dehydrogenase 2</i>                                     | 1.3         | 0.1         | 1.06  | 0.59    | 1.27  | 0.12    |
| <i>hsd17b3</i>  | <i>hydroxysteroid (17-beta) dehydrogenase 3</i>                                   | -1.03       | 0.52        | 1.5   | 0.54    | 1.17  | 0.69    |
| <i>lhb</i>      | <i>luteinizing hormone, beta polypeptide</i>                                      | 1.05        | 0.85        | 1.03  | 0.8     | -1.04 | 0.66    |
| <i>nqo1</i>     | <i>NAD(P)H dehydrogenase, quinone 1</i>                                           | 1.16        | 0.1         | 1.16  | 0.25    | 1.04  | 0.38    |
| <i>star</i>     | <i>steroidogenic acute regulatory protein</i>                                     | <b>1.42</b> | <b>0.03</b> | 1.06  | 0.64    | 1.22  | 0.56    |
| <i>ugt1a2</i>   | <i>UDP glucuronosyltransferase 1 family, polypeptide A2</i>                       | 1.09        | 0.56        | 1.82  | 0.05    | -1.24 | 0.91    |
| <i>vtg1</i>     | <i>vitellogenin 1</i>                                                             | 1.89        | 0.28        | -1.47 | 0.17    | 1.14  | 0.54    |
| <i>vtg3</i>     | <i>vitellogenin 3</i>                                                             | 1.06        | 0.87        | 1.19  | 0.65    | -1.08 | 0.7     |
| <i>vtg5</i>     | <i>vitellogenin 5</i>                                                             | -1.01       | 0.96        | 1.26  | 0.23    | -1.11 | 0.97    |

Fold changes and p-values for microarray data are listed per gene; p-value is determined using ANOVA. Bolded text indicates significant difference from control (FC >1.5, p-value < 0.05). FC, fold change; ANOVA, analysis of variance.

**Supplemental Table 4: Ingenuity Pathway Analysis-generated list of the top 5 enriched pathways in each category of disease and biological functions in TCDD-lineage F<sub>1</sub> and F<sub>2</sub> fish.**

| <b>F1 IPA Top Diseases and Biological Functions</b>  |                   |                   |
|------------------------------------------------------|-------------------|-------------------|
| <b>Category</b>                                      | <b>P-value</b>    | <b># of genes</b> |
| <b>Diseases and Disorders</b>                        |                   |                   |
| Cancer                                               | 1.15E-02-5.76E-06 | 126               |
| Organismal Injury and Abnormalities                  | 1.17E-02-5.76E-06 | 128               |
| Endocrine System Disorders                           | 1.07E-02-7.27E-06 | 26                |
| Gastrointestinal Disease                             | 1.11E-02-7.27E-06 | 101               |
| Metabolic Disease                                    | 1.07E-02-7.27E-06 | 29                |
| <b>Molecular and Cellular Functions</b>              |                   |                   |
| Protein Synthesis                                    | 9.55E-03-4.76E-06 | 18                |
| Cellular Movement                                    | 1.15E-02-3.12E-05 | 36                |
| Cell Death and Survival                              | 9.94E-03-3.91E-05 | 47                |
| Cell Morphology                                      | 1.22E-02-8.50E-05 | 52                |
| Cellular Assembly and Organization                   | 9.94E-03-8.50E-05 | 39                |
| <b>Physiological System Development and Function</b> |                   |                   |
| Behavior                                             | 1.10E-02-1.76E-05 | 30                |
| Organismal Development                               | 1.15E-02-2.26E-05 | 57                |
| Hematological System Development and Function        | 1.17E-02-3.12E-05 | 43                |
| Immune cell Trafficking                              | 1.15E-02-3.12E-05 | 17                |
| Nervous System Development and Function              | 1.05E-02-8.50E-05 | 45                |

| <b>F2 IPA Top Diseases and Biological Functions</b>   |                   |                   |
|-------------------------------------------------------|-------------------|-------------------|
| <b>Category</b>                                       | <b>P-value</b>    | <b># of genes</b> |
| <b>Diseases and Disorders</b>                         |                   |                   |
| Inflammatory Disease                                  | 2.40E-02-4.45E-05 | 34                |
| Dermatological Diseases and Conditions                | 2.40E-02-3.83E-04 | 15                |
| Hematological Disease                                 | 2.27E-02-3.83E-04 | 16                |
| Immunological Disease                                 | 2.40E-02-3.83E-04 | 30                |
| Organismal Injury and Abnormalities                   | 2.40E-02-3.83E-04 | 150               |
| <b>Molecular and Cellular Functions</b>               |                   |                   |
| Molecular Transport                                   | 2.40E-02-3.88E-05 | 41                |
| Cell Death and Survival                               | 2.40E-02-6.35E-04 | 12                |
| Cell Morphology                                       | 2.40E-02-6.35E-04 | 15                |
| Antigen Presentation                                  | 2.40E-02-9.47E-04 | 5                 |
| Protein Synthesis                                     | 1.60E-02-9.47E-04 | 5                 |
| <b>Physiological System Development and Function</b>  |                   |                   |
| Embryonic Development                                 | 2.40E-02-6.35E-04 | 14                |
| Cardiovascular System Development and Function        | 1.60E-02-7.00E-04 | 17                |
| Organ Morphology                                      | 2.40E-02-7.00E-04 | 20                |
| Organismal Development                                | 2.40E-02-7.00E-04 | 24                |
| Skeletal and Muscular System Development and Function | 2.40E-02-7.69E-04 | 20                |

TCDD, 2,3,7,8-tetrachlorodibenzo-*p*-dioxin.

**Supplemental Table 5: qRT-PCR validation of select microarray genes in F<sub>1</sub> and F<sub>2</sub> testes.**

|           | Gene Symbols           | Gene Names                                                  | Microarray  |                 | qRT-PCR                                |         |         |
|-----------|------------------------|-------------------------------------------------------------|-------------|-----------------|----------------------------------------|---------|---------|
|           |                        |                                                             | Fold Change | P-value (ANOVA) | Fold Change ( $2^{-\Delta\Delta Ct}$ ) | SEM     | P-value |
| <b>F1</b> | <i>si:dkeyp-72h1.1</i> | <i>si:dkeyp-72h1.1</i>                                      | -3.08       | 0.022           | -2.52                                  | 0.0963  | 0.015   |
|           | <i>smyd1a</i>          | <i>SET and MYND domain containing 1a</i>                    | -3.6        | 0.0064          | -3.21                                  | 0.1495  | 0.005   |
|           | <i>socs1a</i>          | <i>suppressor of cytokine signaling 1a</i>                  | 1.28        | 0.0782          | 2.07                                   | 0.4494  | 0.026   |
|           | <i>spata4</i>          | <i>spermatogenesis associated 4</i>                         | -19.12      | 0.0506          | -4.71                                  | 0.1981  | 0.031   |
| <b>F2</b> | <i>aste1</i>           | <i>asteroid homolog 1 (Drosophila)</i>                      | -19.84      | 0.005           | -8.62                                  | 0.1107  | 0.019   |
|           | <i>mcf2la</i>          | <i>mcf.2 cell line derived transforming sequence-like a</i> | -1.62       | 0.072           | -1.96                                  | 0.1768  | 0.022   |
|           | <i>mhc1uba</i>         | <i>major histocompatibility complex class I UBA</i>         | -26.44      | 0.004           | -489.76                                | 0.0018  | 0.004   |
|           | <i>spata4</i>          | <i>spermatogenesis associated 4</i>                         | 8.22        | 0.0001          | 80.4                                   | 27.8188 | 0.011   |
|           | <i>zgc:158731</i>      | <i>zgc:158731</i>                                           | 2.02        | 0.0001          | 3.96                                   | 0.8674  | 0.005   |

Fold changes and p-values for microarray and qRT-PCR are listed per gene, with SEM indicated for qRT-PCR data. P-value is determined using ANOVA for microarray and Student's t-test for qRT-PCR. P-values below 0.05 are considered significant. qRT-PCR, quantitative reverse transcription polymerase chain reaction; SEM, standard error of the mean; ANOVA, analysis of variance.
